# Supplementary material for: The environmental impact of unsaturated fluoroesters: atmospheric chemistry towards OH radicals and Cl atoms, radiative behavior and cumulative ozone creation
Source: Royal Society of Chemistry journal article supplement (doi:10.1039/c6ra00630b), 2016-01-01
Supplement: c6ra00630b1.pdf [file c6ra00630b1.pdf]

SUPPLEMENTARY MATERIAL

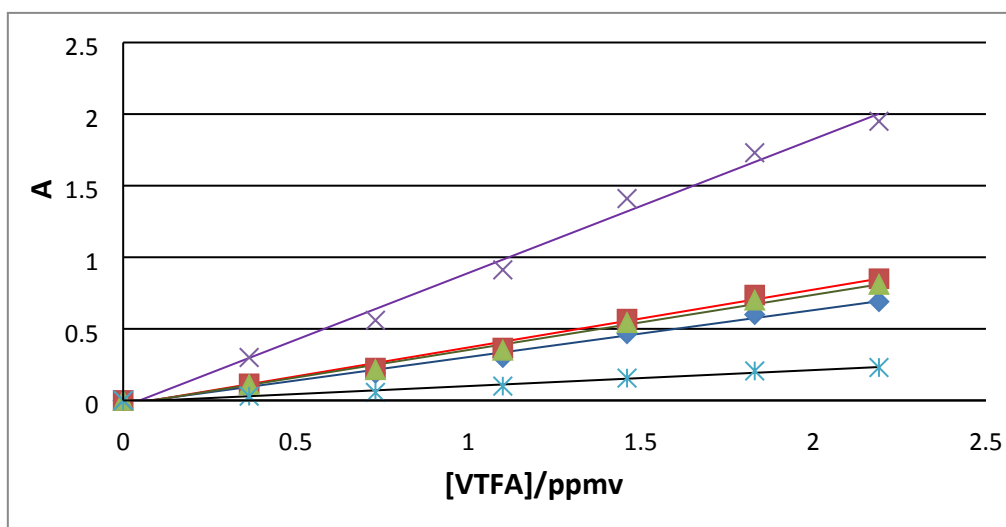

**Figure S1:** Plots of absorbance vs. compound concentration for VTFA, at different wavenumber: 1816 (blue), 1240 (red), 1193 (green), 1160 (purple) and 1657 (orange)  $\text{cm}^{-1}$ .

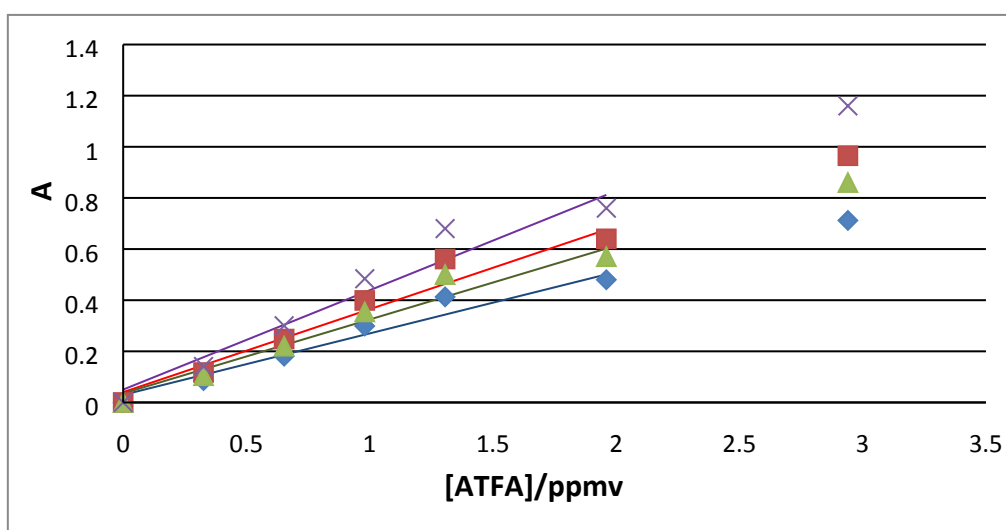

**Figure S2:** Plots of absorbance vs. compound concentration for ATFA, at different wavenumber: 1803 (blue), 1237 (red), 1188 (green), and 1152 (purple)  $\text{cm}^{-1}$ .

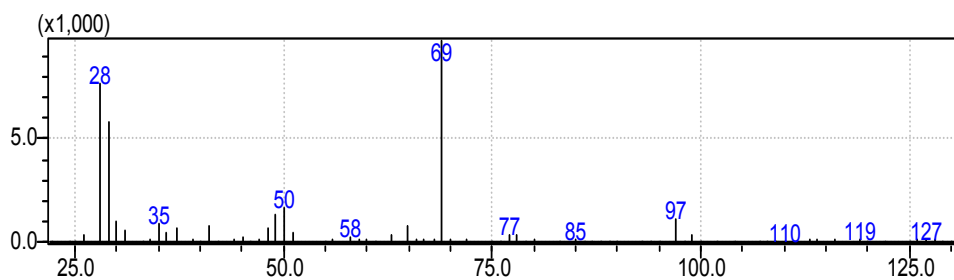

**Figure S3.** Electron impact mass spectrum (EI-MS) corresponding to the identified product in the reaction of VTFA + Cl atoms in presence and absence of NO<sub>x</sub>: CF3C(O)OC(O)CH2Cl.

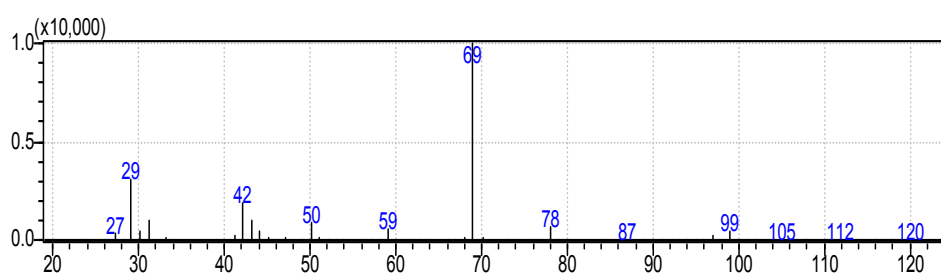

**Figure S4.** Electron impact mass spectrum (EI-MS) corresponding to the identified product in the reaction of ATFA + OH radicals in presence and absence of NO<sub>x</sub>: CF3C(O)OCH2CHO.

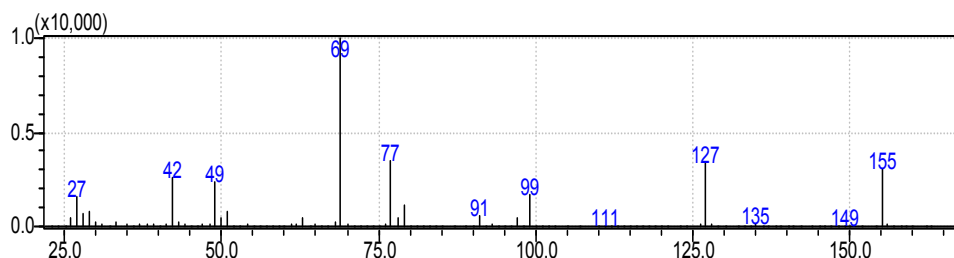

**Figure S5.** Electron impact mass spectrum (EI-MS) corresponding to the identified product in the reaction of ATFA + Cl atoms in presence and absence of NO<sub>x</sub>: CF3C(O)OCH2C(O)CH2Cl.

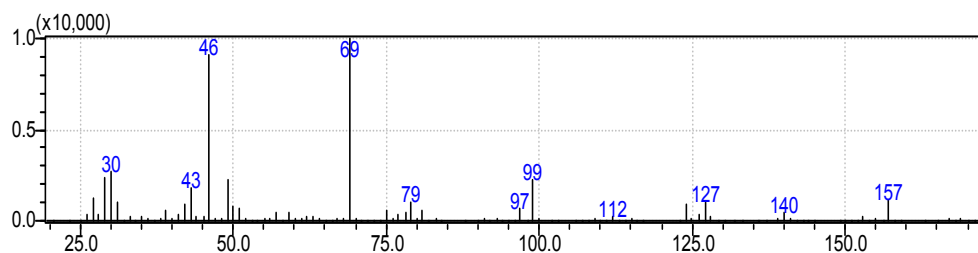

**Figure S6.** Electron impact mass spectrum (EI-MS) corresponding to the detected product in the reaction of ATFA + Cl atoms in presence of NO<sub>x</sub>: alkyl nitrate.
